# Supplementary material for: Identification of potential benzoxazolinones as CYP1B1 inhibitors via molecular docking, dynamics, waterswap, and in vitro analysis
Source: Royal Society of Chemistry journal article supplement (doi:10.1039/d3nj01138k), 2023-01-01
Supplement: d3nj01138k1.pdf [file d3nj01138k1.pdf]

**Identification of potential benzoxazolinones as CYP1B1 inhibitors via  
molecular docking, dynamics, waterswap, and *In vitro* analysis**

Baddipadige Raju<sup>a</sup>, Himanshu Verma<sup>a</sup>, Gera Narendra<sup>a</sup>, Gurleen Kaur<sup>b</sup>, Subheet Kumar jain<sup>c</sup>,  
Om Silakari<sup>a\*</sup>

<sup>a</sup>*Molecular Modeling Lab (MML), Department of Pharmaceutical Sciences and Drug  
Research, Punjabi University, Patiala, Punjab, 147002, India*

<sup>b</sup>*Center for Basic and Translational Research in Health Sciences, Guru Nanak Dev  
University, Amritsar, India*

<sup>c</sup>*Department of Pharmaceutical sciences, Gurunanak Dev University, Amritsar, India*

Corresponding authors E-mail: [mmlpup73@gmail.com](mailto:mmlpup73@gmail.com); Tel: +91-9501542696; Fax: +91-  
1752283075

**Supplementary Information**

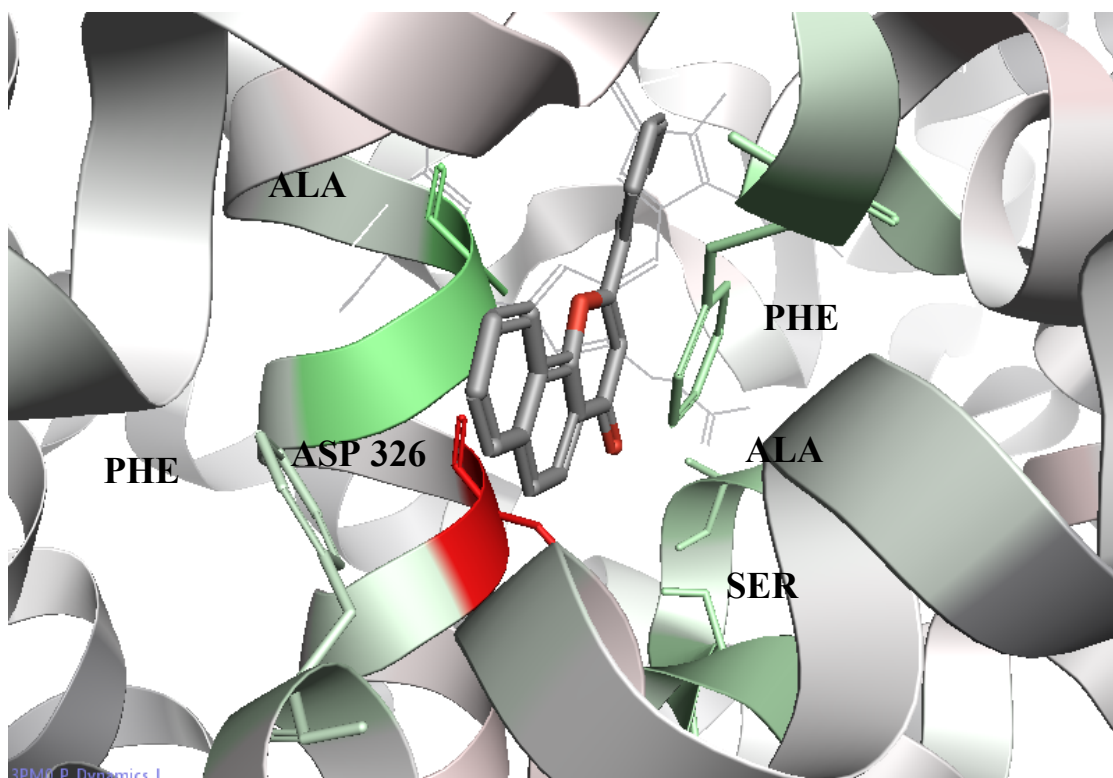

**Figure S1.** Binding free energy contribution diagram of ANF (co-crystal ligand) from WaterSwap analysis. The green color represents residues that are favorable to ligand interactions; the darker the green, the more favorable; red represents residues that are unfavorable to ligand binding

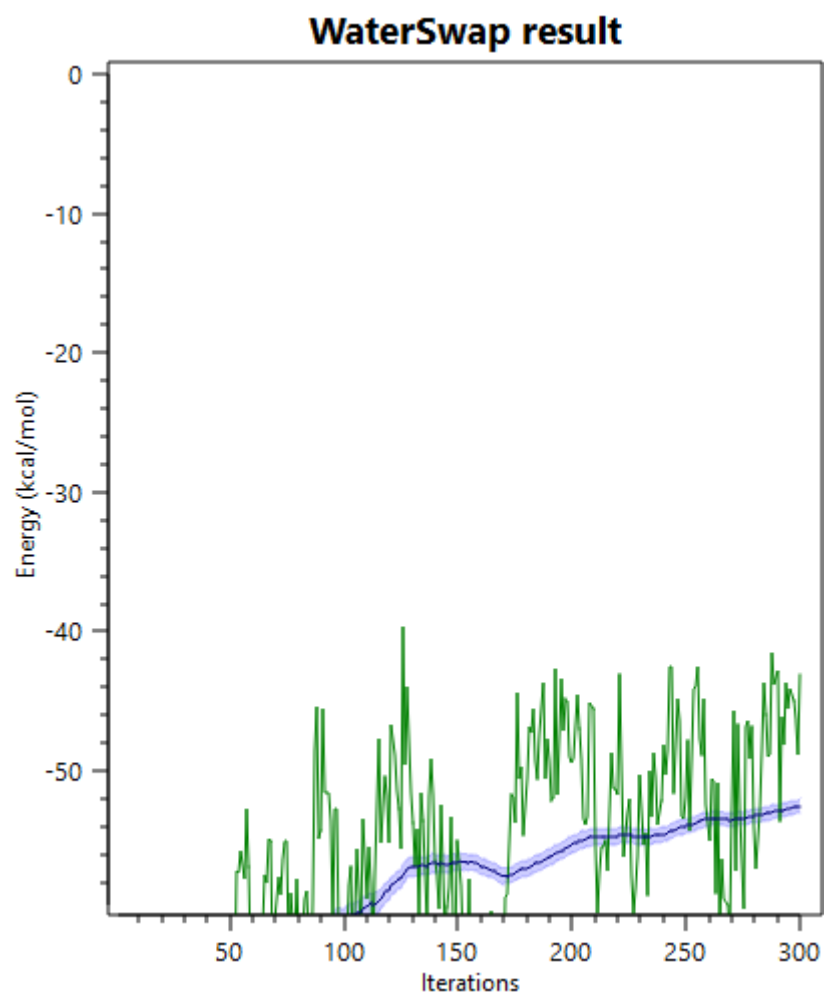

**Figure S2.** Consensus free energy values and iterations of the reference compound i.e. ANF
